# Thyroid Hormone Action in Neural Development

Catherine C. Thompson and Gregory B. Potter

Johns Hopkins University School of Medicine, Department of Neuroscience, Kennedy Krieger Institute, Baltimore, MD 21205, USA

**Effects of thyroid hormone on development of the brain have been documented for over a century. Although in many respects the hypothyroid brain appears morphologically normal, functional impairments include mental retardation, ataxia and spasticity. Keyed by the discovery of nuclear receptors for thyroid hormone that function as transcription factors, recent work has examined the mechanism of thyroid hormone action in brain development. The prediction that gene expression regulated by thyroid hormone is important for mediating brain development has spurred the search for thyroid hormone-responsive genes. Here we review some of the identified genes whose expression patterns correlate with the functional deficits observed in the hypothyroid brain. Recently identified thyroid hormone-responsive genes include synaptotagmin-related gene 1 (*Srg1*), a putative mediator of synaptic structure and/or activity, and *hairless*, a transcriptional cofactor that may influence the expression of other thyroid hormone-responsive genes.**

## Introduction

Neurological disorders can be caused by a number of environmental and genetic insults to the developing brain. Although the cause of such disorders can often be determined, in many cases the brain shows no apparent abnormalities. In some instances, undetected changes in dendritic and synaptic organization of the cerebral cortex may be responsible for compromised brain function (Huttenlocher, 1991). Mental retardation resulting from neonatal thyroid hormone deficiency is an example of a disorder in which subtle changes in neural circuitry are associated with devastating functional consequences.

## Thyroid Hormone and Brain Development

Thyroid hormone (TH) is essential for proper mammalian development. Lack of sufficient TH results in abnormal development of virtually all organ systems, a syndrome termed cretinism (Schwartz, 1983; Delange, 1996). In particular, the brain is severely affected; functional deficits include mental retardation, ataxia, spasticity and deafness (DeLong, 1996). Most cases of neonatal TH deficiency can be treated effectively with TH replacement therapy. However, the timing of TH treatment is crucial. Treatment initiated within weeks after birth restores essentially normal development, while treatment after this critical period is ineffective (A.H. Klein *et al.*, 1972; R.Z. Klein *et al.*, 1996). Despite the existence of efficacious treatments and neonatal testing for congenital hypothyroidism, neonatal TH deficiency remains the leading cause of preventable mental retardation worldwide (Hetzl, 1994).

Although neonatal TH deficiency severely impacts development, it is rarely fatal. As a result, little information is available describing morphological changes occurring during the critical period of TH action in hypothyroid human brain. Thus, the study of morphological, molecular and biochemical effects of TH

on brain development has relied on the use of experimental animal models. The pioneering studies of Eayrs and colleagues established the rat as a viable model system for examining the effects of TH deficiency on the developing mammalian brain (Eayrs, 1960, 1971). The examination of both morphological and behavioral effects of TH deficiency on the brain demonstrated that neonatal TH deficiency in rats causes growth and neurological abnormalities similar to human cretinism. As in humans, a similar critical period of action was recognized, which in the rat corresponds to the first two postnatal weeks.

TH deficiency results in multiple morphological alterations in neonatal rat brain [reviewed by Schwartz and DeLong (Schwartz, 1983; DeLong, 1996)]. Cells in the cortex are smaller and more closely aggregated than normal, due in part to an overall decrease in development of axonal and dendritic processes. Axonal density is decreased and the probability of axo-dendritic interaction is reduced by an estimated 80% (Eayrs, 1960, 1971). More recent studies have identified specific alterations in dendritic morphology in several cell types, including pyramidal cells in the cerebral cortex (decrease in dendritic spine number) (Schwartz, 1983), pyramidal cells in the visual cortex (reduced number and altered distribution of dendritic spines) (Ruiz-Marcos *et al.*, 1979; Morreale de Escobar *et al.*, 1983), cholinergic basal forebrain neurons (decreased number of primary dendrites and number of dendritic branchpoints) (Gould and Butcher, 1989), Purkinje cells (decreased number and size of dendritic spines) (Nicholson and Altman, 1972; Legrand, 1979) and granule and pyramidal cells in the hippocampus (decreased branching of apical and basal dendrites) (Rami *et al.*, 1986). Thus, TH influences the size, packing density and dendritic morphology of neurons throughout the brain.

Dendritic spines are sites of synaptic connections; dendritic changes may thus directly affect synapse number and formation, and thereby underlie cognitive deficits. A study by Eayrs examining the effects of thyroidectomy showed a positive correlation between the severity of dendritic defects and behavior in rats (Eayrs, 1960). The morphological and functional deficits caused by lack of TH, in particular dendritic abnormalities, are similar to those observed in human mental retardation disorders. For example, morphological changes observed in Rett syndrome include alterations in dendritic shaft and spine number (Armstrong, 1997). In addition, changes in neuronal packing density have been noted in Williams and Rubinstein-Taybi syndromes (Pogacar *et al.*, 1973; Bellugi *et al.*, 1999). Cell packing density could be altered as a consequence of reduced neurite number and/or size, and may also be related to cell differentiation.

TH deficiency also causes specific defects in cell migration and differentiation. In the cerebellum, both migration and differentiation of granule cells is affected (Oppenheimer and Schwartz, 1997). During cerebellar development, proliferating

cells from the external granular layer (EGL) migrate inward, differentiating in the process and establishing contacts with Purkinje cells. By postnatal day 21, the EGL has disappeared and mature granule cells populate the internal granule cell layer (IGL). In hypothyroid brain, the EGL persists significantly longer, due to a delay in the migration and/or differentiation of cells in the EGL (Nicholson and Altman, 1972; Rabie and Legrand, 1973). The EGL eventually disappears and the overall organization of the cerebellar cortex appears normal. However, the delay in migration may disrupt the precise timing required to establish productive interneuronal connections, and thus cause the decreased number and density of synaptic contacts between granule cells and Purkinje cells (Nicholson and Altman, 1972; Rabie and Legrand, 1973; Legrand, 1979). Delay rather than absence of a particular cell type or process is characteristic of the hypothyroid phenotype. The role of timing may underlie the observed critical period of TH action after which damage caused by TH deficiency is irreversible.

Another striking defect in the hypothyroid neonatal brain is the reduction in myelination. Myelin is a multilamellar membrane produced by oligodendrocytes that surrounds and supports axons, facilitating the conduction of nerve impulses and axon survival. Thus, reduction of myelination can have marked effects upon neuronal connectivity and the establishment of neuronal networks. Neonatal hypothyroidism leads to an overall decrease in myelination, characterized by a reduction in the quantity of both myelin lipids and proteins (Schwartz, 1983). TH governs the differentiation of oligodendrocytes from O2A precursor cells under the concerted actions of fibroblast and platelet-derived growth factors, and is thought to primarily regulate the timing of differentiation (Barres *et al.*, 1994; Johe *et al.*, 1996). Thus, the decline in myelination may be linked to the influence of TH on oligodendrocyte differentiation. Whether TH is involved solely in timing or is also instructive for initiating the differentiated phenotype is not clear.

### Molecular Mechanism of Thyroid Hormone Action in the Brain

The wealth of physiological data from hypothyroid rat brain provides a framework in which to analyze the molecular basis of TH action during brain development. The effects of TH are mediated through the action of specific nuclear receptor proteins that function as inducible transcription factors (Evans, 1988; Tsai and O'Malley, 1994). There are two structurally related TH receptors ( $\alpha$  and  $\beta$ ) encoded by distinct genes. Both TH receptor genes produce alternatively spliced isoforms (Lazar, 1993). The expression of TH receptors in the developing rat brain has been well established (Schwartz and Oppenheimer, 1978; Bradley *et al.*, 1992; Mellström *et al.*, 1991). TH receptors bind to specific DNA sequences, TH response elements (TREs), located near specific target genes. Upon hormone binding, TH receptors influence their transcription rate. Gene expression can be activated or repressed via TH action, implying complicated regulatory mechanisms involving multiple interacting proteins, such as coactivators or corepressors (Koenig, 1998; Xu *et al.*, 1999). The presence of TH receptors in the brain suggests that TH in the developing brain exerts its effects by regulating the expression of specific genes [reviewed by Oppenheimer and Schwartz (Oppenheimer and Schwartz, 1997)].

Genes regulated by TH in the brain comprise a genetic program that, when set in motion by TH, directs proper development. Thus, TH initiates a cascade of gene expression in which the products of genes first induced by TH influence expression of other, downstream genes. Initially expressed genes are those

that respond directly to hormone-bound TH receptors without first inducing expression of other factors. Such genes can be defined experimentally as those induced in the absence of new protein synthesis and are considered 'direct response' or 'immediate early' genes. This paradigm has been used to classify genes induced by serum in quiescent fibroblasts and by synaptic activity in the brain, as well as induction of gene expression by TH in *Xenopus* metamorphosis (Lau and Nathans, 1985; Cole *et al.*, 1989; Wang and Brown, 1991; Brown *et al.*, 1996). Direct regulation by TH requires TRE sequences, although *in vitro* activity of a TRE sequence does not necessarily reflect *in vivo* regulation. Additional factors, including other DNA binding proteins, coactivators and corepressors, coordinate to ultimately govern gene expression *in vivo*. Thus, the best evidence for whether a gene responds directly to TH is both resistance to protein synthesis inhibitors and identification of a functional TRE. To date, few direct response genes for TH have been identified in mammalian brain. The rat *hairless* gene, a recently identified TH-responsive gene that fits the criteria for a direct response gene, will be described.

### The Search for Thyroid Hormone-responsive Genes in Mammalian Brain

In order to understand the mechanism by which TH affects brain development, the identification of specific genes regulated by TH is necessary. Two general approaches have been used to identify genes regulated by TH in developing rat brain. Screens using molecular biological techniques such as subtractive hybridization and whole-genome polymerase chain reaction (PCR) have identified several genes differentially regulated between hypothyroid and euthyroid brain (Muñoz *et al.*, 1991; Iglesias *et al.*, 1996; Thompson, 1996). A second approach uses the characteristic deficiencies in hypothyroid brain to identify candidate genes that may be under TH control. For example, analysis of genes encoding myelin-associated proteins revealed that these genes are TH-responsive (Farsetti *et al.*, 1991; Tosic *et al.*, 1992; Rodríguez-Peña *et al.*, 1993). Since TH deficiency has wide ranging effects on brain development, it is not surprising that a variety of genes are regulated by TH in the neonatal brain. However, expression of most known TH-responsive genes is reduced only 2- to 3-fold in hypothyroid versus euthyroid animals and regulation is often slow (>24 h). Although few of the presently known TH-responsive genes are directly regulated by TH, we will discuss several for which expression is associated with morphological defects resulting from TH deficiency.

### Myelination

A striking phenotype in the hypothyroid neonatal brain is the reduction in myelination. The major constituents of CNS myelin include myelin basic protein (MBP), proteolipid protein (Plp), 2',3'-cyclic nucleotide 3'-phosphodiesterase (CNPase) and myelin associated glycoprotein (MAG). Each of these genes has been analyzed for regulation by TH and all show reduced mRNA levels in hypothyroid neonatal rat brain. MBP mRNA levels are reduced 4-fold in hypothyroid rat brain, and a functional TRE has been mapped in the MBP gene (Farsetti *et al.*, 1992; Pombo *et al.*, 1999). The level of Plp, CNPase and MAG mRNA in neonatal hypothyroid animals is reduced 1.5-, 2- and 4-fold, respectively (Ibarrola and Rodríguez-Peña, 1997). The effect of TH on myelin-associated genes is likely to be a combination of transcriptional and post-transcriptional regulation (Farsetti *et al.*, 1991; Ibarrola and Rodríguez-Peña, 1997; Strait *et al.*, 1997). The reduction of myelin-protein gene expression in hypothyroid brain likely plays

a significant role in the observed effects of hypothyroidism on myelination.

### **Cell Differentiation and Migration**

During development, cell differentiation, migration and survival play key roles in the formation of interneuronal networks. Neurotrophins and their receptors are important modulators of cell survival and differentiation in the brain. Using the candidate gene approach, the mRNA levels of the neurotrophins NGF, BDNF and NT-3 were measured in hypothyroid neonatal rat brain and found to be reduced 1.5-, 2.5- and 2-fold, respectively (Lindholm *et al.*, 1993; Alvarez-Dolado *et al.*, 1994; Leingartner *et al.*, 1994; Koibuchi *et al.*, 1999). Similarly, the mRNAs encoding the neurotrophin receptors *trkA* and *trkB* are reduced by 1.5- and 2-fold, respectively (Alvarez-Dolado *et al.*, 1994; Knipper *et al.*, 1999). Although TH has only a modest effect on the expression level of these genes, regulation of neurotrophins and their receptors by TH may be significant. For example, TH has been shown to influence the number of cholinergic neurons and the degree of innervation of hippocampal CA3 and CA1 regions (Oh *et al.*, 1991). Cholinergic basal forebrain neurons express *trkA* while their targets in the hippocampus express NGF, suggesting a potential mechanism by which TH can influence neuronal number and connectivity in the forebrain (Roskoden *et al.*, 1999). In the cerebellum, BDNF expressed by Purkinje and granule cells has been shown to influence granule cell axon elongation and survival (Koibuchi *et al.*, 1999). In addition, BDNF knockout mice exhibit cerebellar deficits similar to those of hypothyroid animals, such as a delay in granule cell migration and a reduction in Purkinje cell arborization (Schwartz *et al.*, 1997). Furthermore, NT-3 expression by granule cells can promote differentiation of Purkinje cells (Lindholm *et al.*, 1993). Thus, TH regulation of BDNF and NT-3 expression may be involved in mediating cerebellar development.

TH also influences cell migration, a process important for establishing interneuronal connections and the overall anatomy of the brain. *Reeler* mutant mice show neuronal positioning abnormalities in the neocortex, hippocampus and cerebellum (Lyon and Searle, 1989; Rakic and Caviness, 1995). Thus, *reelin*, the gene disrupted in *reeler* mutants, is thought to be involved in neuronal migration and lamination during development. The level of *reelin* mRNA is reduced 2-fold in the cerebral cortex of perinatal hypothyroid rats (Alvarez-Dolado *et al.*, 1999). TH regulation of *reelin* expression likely influences some aspects of neuronal migration in the forebrain. Another protein involved in cell migration, neural cell adhesion molecule (NCAM), was found to be TH-responsive using a whole-genome PCR-based screen (Iglesias *et al.*, 1996). Expression of NCAM is increased 2-fold in neonatal hypothyroid brain. NCAM is important in regulating cell-cell interactions as well as mediating proper cell migration in the CNS (Tomasiewicz *et al.*, 1993).

### **Dendritic Structure/Synaptogenesis**

Neonatal hypothyroidism results in altered neuronal structure and function, including reduction in neurite outgrowth, synaptogenesis and dendritic elaborations. RC3/neurogranin is a gene directly regulated by thyroid hormone whose expression is consistent with a role in synapse formation and/or function. RC3/neurogranin mRNA levels are reduced 2- to 3-fold in hypothyroid neonatal rat brain, and a functional TRE has been mapped to the first intron of the RC3/neurogranin gene (Muñoz *et al.*, 1991; Martínez de Arrieta *et al.*, 1999). The RC3/

neurogranin protein binds calmodulin and is a substrate for protein kinase C (Iñiguez *et al.*, 1992). The function of RC3/neurogranin is not known, but the protein accumulates in the dendritic spines of specific cortical neurons, where it may act to regulate the level of free calmodulin (Iñiguez *et al.*, 1993). Thus, it is feasible that RC3/neurogranin may play a role in synaptic structure or function.

A gene identified by testing cerebellum-specific genes for TH-dependent expression is Purkinje cell protein-2 (Pcp-2) (Strait *et al.*, 1992). Pcp-2 mRNA levels are reduced 3.6-fold in P15 hypothyroid rat brain, and the Pcp-2 gene contains two TRES capable of mediating TH-responsive expression (Zou *et al.*, 1994; Hagen *et al.*, 1996). While the function of Pcp-2 is unknown, its specific expression in Purkinje cells suggests it could be involved in mediating the effects of TH on Purkinje cell morphology.

Synaptotagmin-related gene 1 (Srg1), a novel TH-responsive gene recently identified in our lab, may also be involved in synapse formation and/or function (Thompson, 1996). The protein encoded by Srg1 is structurally similar to synaptotagmins, a family of proteins found primarily in the brain (Südhof and Rizo, 1996). One of the synaptotagmin proteins, synaptotagmin I, is localized to synaptic vesicles and is involved in mediating neurotransmitter release (Geppert *et al.*, 1994). Srg1 mRNA expression is reduced ~3-fold in hypothyroid cerebellum. Treatment with TH induces expression in hypothyroid cerebellum within 2 h (Thompson, 1996). Srg1 expression is developmentally regulated, reaching high levels at postnatal day 7 and rising to a peak at postnatal day 14. This is a period within which TH is known to be critical and when both TH and TH receptor levels rise dramatically. Srg1 is preferentially expressed in the brain; expression has not been detected outside the nervous system in neonatal (P15) or adult rats (Thompson, 1996) (F.F. Facchinetti *et al.*, submitted for publication). Detailed examination of Srg1 expression in the brain by *in situ* hybridization demonstrated that Srg1 is highly expressed in cerebellum, hippocampus, cortex and striatum (Thompson, 1996). Further studies have indicated that Srg1 is specifically expressed in neurons (F.F. Facchinetti *et al.*, submitted for publication).

The effect of TH on Srg1 expression is reflected at the protein level. The 45 kDa protein encoded by Srg1 is detected only in brain (Figure 1A; F.F. Facchinetti *et al.*, submitted for publication). Expression of Srg1 protein is dramatically reduced in both hypothyroid brain and in neurons cultured in the absence of TH (Figure 1B; F.F. Facchinetti *et al.*, submitted for publication). During development, Srg1 expression is significantly delayed in hypothyroid brain. Srg1 is normally expressed at postnatal day 12 but in hypothyroid cerebellum is not detected until postnatal day 21 (F.F. Facchinetti *et al.*, submitted for publication). Studies to determine the cellular localization of Srg1 protein revealed a punctate distribution primarily in neurites, both in brain sections and in cultured neurons (Figure 2). The distribution of Srg1 protein specifically in axons and/or dendrites suggests that it may have a role in synapse formation or function. Although the function of Srg1 and other synaptotagmin genes is not known, developmentally regulated expression of Srg1, together with its distribution in neurites and the effects of TH on synapse formation, suggests that Srg1 may have an important role in the brain.

### **Transcriptional Regulation**

TH acts to regulate gene transcription; thus the influence of TH on expression of transcription factors could render many

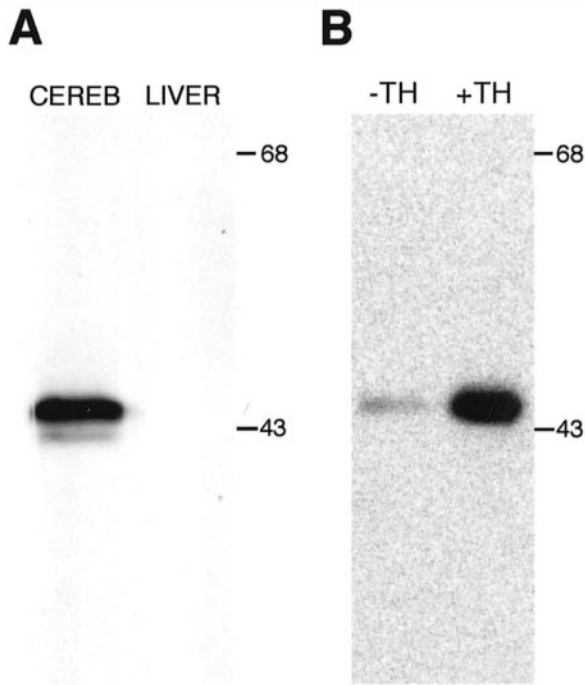

**Figure 1.** Neural expression of Srg1 protein. (A) Srg1 protein is specifically expressed in neonatal rat brain. Western analysis of whole-cell extracts from postnatal day 15 rat tissues using Srg1-specific antiserum. CEREB, cerebellum. (B) Srg1 protein levels are influenced by thyroid hormone. Srg1 protein expression in cerebellar granule cells cultured in the absence (-TH) or presence (+TH) of thyroid hormone. Equal amounts of total protein were loaded per lane and verified by Ponceau Red staining (data not shown). Position of molecular weight standards (kDa) is indicated.

additional genes under indirect TH control. Krox-24/NGFI-A/Egr-1 encodes a transcription factor originally identified as an immediate early gene in fibroblasts and subsequently shown to be induced by membrane depolarization and synaptic activity (Jahner *et al.*, 1991). Krox-24 expression is detected in various brain regions, such as striatum, cortex and cerebellum (Mellström *et al.*, 1994). Expression of Krox-24 is regulated by TH through an upstream TRE, and its levels are reduced 4- to 8-fold in hypothyroid neonatal rat brain. The induction of Krox-24 expression by membrane depolarization and synaptic activity indicates it may be involved in modulating neuronal connectivity and synaptic plasticity (Ghorbel *et al.*, 1999).

Calcium calmodulin-dependent kinase IV (CamKIV) influences transcription by modifying the activity of specific transcription factors. CamKIV protein levels were found to be regulated by TH in rat telencephalon cell culture (Krebs *et al.*, 1996). Through phosphorylation, CamKIV regulates the activity of CRE binding protein (CREB) and serum response factor (SRF), implicating CamKIV in the Ca<sup>2+</sup>-dependent expression of immediate early genes through either CREB or SRF (Krebs *et al.*, 1996). Thus, TH control of CaMKIV expression might indirectly influence the Ca<sup>2+</sup>-dependent gene expression.

A TH-responsive gene identified in our screen of neonatal cerebellum, the rat *hairless* (*hr*) gene, may also have a role in transcriptional regulation. The *hr* gene was originally identified as a spontaneous mutation that causes progressive hair loss in mice (Lyon and Searle, 1989; Cachon-Gonzalez *et al.*, 1994). Expression of *hr* is highly (>10-fold) and rapidly (< 4h) up-regulated by TH in neonatal cerebellum (Thompson, 1996). TH

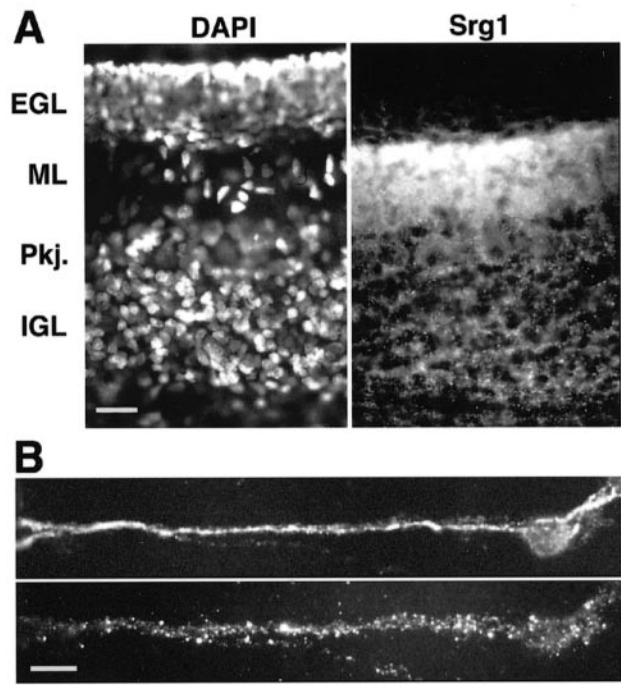

**Figure 2.** Srg1 protein is localized to neurites. (A) Expression of Srg1 in neonatal rat cerebellum. Sections from postnatal day 12 rat cerebellum were used for immunofluorescent (IF) staining with Srg1-specific antiserum and visualized with Cy3-conjugated anti-rabbit secondary antibody. Left, DAPI staining of cell nuclei shows cytoarchitecture of cerebellum; right, indirect IF detection of Srg1 protein. Srg1 is abundant in the cell-sparse and neurite-rich molecular layer and shows punctate staining in the IGL. EGL, external granule cell layer; ML, molecular layer; Pkj., Purkinje cell layer; IGL, internal granule cell layer. Scale bar = 20  $\mu$ m. (B) Expression of Srg1 in neurons. Cultured cerebellar granule cells were simultaneously labeled for Srg1 and MAP2 using indirect immunofluorescence. Top, IF staining for MAP2, a dendritic marker, shows a dendrite extending to the left from a granule cell body. Bottom, image of the same cell showing IF staining for Srg1. Note the punctate expression pattern along the length of the dendrite. Scale bar = 10  $\mu$ m. Srg1 was detected using Srg1-specific antiserum and visualized with Cy3-conjugated anti-rabbit secondary antibody. MAP2 was detected using a monoclonal MAP2-specific antiserum and visualized with FITC-conjugated anti-mouse secondary antibody.

induction of *hr* expression occurs in the absence of protein synthesis in both cultured pituitary cells and neurons (Figure 3) (Thompson, 1996). In fact, expression of *hr* is superinduced in the presence of TH and cycloheximide, a phenomenon previously observed for immediate early genes such as *c-fos*.

Further experiments have shown that the *hr* gene has a potent TRE that binds TH receptors and confers TH-responsiveness to a heterologous promoter (Thompson and Bottcher, 1997). Together these data indicate that *hr* is directly regulated by TH, making it one of the first definitive direct target genes identified in the mammalian CNS.

The finding that *hr* is regulated by TH in the brain suggests that *hr* may have a role in neural development. Temporal expression of *hr* is consistent with this proposal. Expression of *hr* is first detected at embryonic day 18, reaching high levels shortly after birth. Neonatal expression is coincident with TH receptor  $\beta$  expression and is within the period of development shown to be influenced by TH (Thompson, 1996). Like hypothyroid brain, *hr* mutant brain shows no gross morphological abnormalities, although subtle alterations in Purkinje cell structure have been reported for the *hr*<sup>rh</sup> allele (García-Atares *et al.*, 1998). Detailed analysis of *hr* expression using *in situ* hybridization revealed that

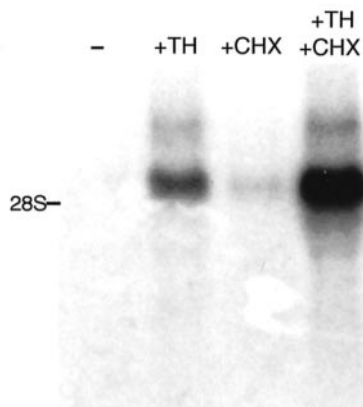

**Figure 3.** *Hairless* is directly regulated by thyroid hormone in neurons. Northern analysis showing expression of *hr* mRNA in cerebellar granule cells cultured in the absence of TH (-), treated with thyroid hormone (+TH), treated with cycloheximide (+CHX) or treated with both thyroid hormone and cycloheximide (+TH+CHX). Note that induction of *hr* expression by TH is not blocked but rather is superinduced by cycloheximide. 15  $\mu$ g of total RNA was loaded per lane and equal loading was verified by ethidium bromide staining (data not shown). The position of 28S ribosomal RNA is indicated.

*hr* is expressed in many brain regions, including the cerebellum, hippocampus, cortex and thalamus (G.B. Potter and C.C. Thompson, unpublished data). Thus, it will be important to determine if these regions of the brain show morphological defects in *hr* mutant mice. In addition, it is not known whether *hr* mutant mice suffer from learning and/or motor defects. We have begun to address this issue; preliminary behavioral testing of *hr* mice has shown some sensorimotor abnormalities (A.C. DeVries and C.C. Thompson, unpublished data). The recent identification of the human *hr* gene will enable the study of potential neurological phenotypes in humans (Ahmad *et al.*, 1998; Cichon *et al.*, 1998).

The function of the protein encoded by *hr* (Hr) is under investigation. The 1207 amino acid Hr protein does not share significant homology to known structural motifs, although it shows partial homology to a testis-specific cDNA of unknown function (Höög *et al.*, 1991; Cachon-Gonzalez *et al.*, 1994). To begin to understand the biochemical function of Hr, we identified proteins that interact with it. Remarkably, we found that Hr interacts directly and specifically with TH receptors, the same proteins that regulate its expression. Hr localizes to the nucleus, indicating that it can interact with TH receptors *in vivo* (Thompson and Bottcher, 1997). In addition, Hr is capable of repressing transcription in a cotransfection assay, suggesting it functions as a transcriptional corepressor (Thompson and Bottcher, 1997). Corepressors are proteins that mediate transcriptional repression by interaction with DNA binding proteins. Nuclear receptor corepressors are ubiquitously expressed and interact with multiple receptors (Chen and Evans, 1995; Hörlein *et al.*, 1995). Hr is distinct from other corepressors in its restricted expression pattern and lack of interaction with retinoic acid receptor (Thompson and Bottcher, 1997). Regulation of *hr* expression by TH, together with evidence that Hr interacts with TH receptors, indicates that *hr* may be a key mediator of TH action in the brain. We are currently testing a model which predicts that Hr influences the expression of downstream TH-responsive genes.

## Conclusions

Significant advances have been made in identifying the targets of TH action in the brain, TH-responsive genes, over the past several years. It is likely that many more TH-responsive genes in developing mammalian brain remain to be discovered, in particular genes that are directly regulated by TH. A further challenge will be to determine the functional role of the proteins encoded by TH-responsive genes on brain development and function. The ability to control development in experimental animals by manipulating TH levels makes neonatal TH deficiency an excellent model system for studying crucial developmental processes such as cell differentiation, migration and establishment of the appropriate neural circuitry. The morphological and functional defects caused by lack of TH are similar to those observed in other developmental disorders, including low IQ, reduced dendritic branching of particular neurons, reduction in synapse number and increased cell packing density. Thus, understanding the molecular mechanisms underlying cretinism is likely to shed light on other developmental disorders as well.

## Notes

We thank F. Facchinetti for providing cultured granule cells, S. Chen for technical assistance, and C. Potter and M. Lilly for comments on the manuscript. Work from the authors' laboratory was supported by the John Merck Fund and National Institutes of Health (DK46074).

Address corresponding to Catherine C. Thompson, Johns Hopkins University School of Medicine, Department of Neuroscience, Kennedy Krieger Institute, Baltimore, MD 21205, USA. Email: thompsonc@kennedykrieger.org.

## References

- Ahmad W, Faiyaz ul Haque M, Brancolini V, Tsou HC, ul Haque S, Lam H, Aita VM, Owen J, deBlaquiere M, Frank J, Cserhalmi-Friedman PB, Leask A, McGrath JA, Peacocke M, Ahmad M, Ott J, Christiano AM (1998) Alopecia universalis associated with a mutation in the human *hairless* gene. *Science* 279:720-724.
- Alvarez-Dolado M, Iglesias T, Rodriguez-Peña A, Bernal J, Muñoz A (1994) Expression of neurotrophins and the *trk* family of neurotrophin receptors in normal and hypothyroid rat brain. *Mol Brain Res* 27: 249-257.
- Alvarez-Dolado M, Ruiz M, Río JAD, Alcántara S, Burgaya F, Sheldon M, Nakajima K, Bernal J, Howell BW, Curran T, Soriano E, Muñoz A (1999) Thyroid hormone regulates *reelin* and *dab1* expression during brain development. *J Neurosci* 19:6979-6993.
- Armstrong DD (1997) Review of Rett syndrome. *J Neuropathol Exp Neurol* 56:843-849.
- Barres BA, Lazar MA, Raff MC (1994) A novel role for thyroid hormone, glucocorticoids and retinoic acid in timing oligodendrocyte development. *Development* 120:109-1108.
- Bellugi U, Lichtenberger L, Mills D, Galaburda A, Korenberg JR (1999) Bridging cognition, the brain and molecular genetics: evidence from Williams syndrome. *Trends Neurosci* 22:197-207.
- Bradley DJ, Towle HC, Young WS (1992) Spatial and temporal expression of  $\alpha$  and  $\beta$  thyroid hormone receptor mRNAs, including the  $\beta$ 2 subtype, in the developing mammalian nervous system. *J Neurosci* 12:2288-2302.
- Brown DD, Wang Z, Furlow JD, Kanamori A, Schwartzman RA, Remo BF, Pinder A (1996) The thyroid hormone-induced tail resorption program during *Xenopus laevis* metamorphosis. *Proc Natl Acad Sci USA* 93:1924-1929.
- Cachon-Gonzalez MB, Fenner S, Coffin JM, Moran C, Best S, Stoye JP (1994) Structure and expression of the *hairless* gene of mice. *Proc Natl Acad Sci USA* 91:7717-7721.
- Chen JD, Evans RM (1995) A transcriptional corepressor that interacts with nuclear hormone receptors. *Nature* 377:454-457.
- Cichon S, Anker M, Vogt IR, Rohleder H, Putzstuck M, Hillmer A, Farooq SA, Al-Dhafri KS, Ahmad M, Haque S, Rietschel M, Propping P, Kruse R, Nothen MM (1998) Cloning, genomic organization, alternative transcripts and mutational analysis of the gene responsible for

- autosomal recessive universal congenital alopecia. *Hum Mol Genet* 7:1671-1679.
- Cole AJ, Saffen DW, Baraban JM, Worley PF (1989) Rapid increase of an immediate early gene messenger RNA in hippocampal neurons by synaptic NMDA receptor activation. *Nature* 340: 474-476.
- Delange FM (1996) Endemic cretinism. In: *The thyroid* (Braverman LE, Utiger RD, eds), pp. 756-765. New York: J.B. Lippincott.
- DeLong GR (1996) The neuromuscular system and brain in hypothyroidism. In: *The thyroid* (Braverman LE, Utiger RD, eds), pp. 826-835. New York: J.B. Lippincott.
- Eayrs JT (1960) Influence of the thyroid on the central nervous system. *Br Med Bull* 16: 122-127.
- Eayrs JT (1971) Thyroid and developing brain: anatomical and behavioral effects. In: *Hormones in development* (Hamburgh M, Barrington EJW, eds), pp. 345-355. New York: Meredith.
- Evans RM (1988) The steroid and thyroid hormone receptor superfamily. *Science* 240:889-895.
- Farsetti A, Mitsuhashi T, Desvergne B, Robbins J, Nikodem VM (1991) Molecular basis of thyroid hormone regulation of myelin basic protein gene expression in rodent brain. *J Biol Chem* 266:23226-23232.
- Farsetti A, Desvergne B, Hallenbeck P, Robbins J, Nikodem VM (1992) Characterization of myelin basic protein thyroid hormone response element and its function in the context of native and heterologous promoter. *J Biol Chem* 267:15784-15788.
- García-Atares N, San Jose I, Cabo R., Vega JA, Represa J (1998) Changes in the cerebellar cortex of hairless Rhino-J mice (hr-rh-j). *Neurosci Lett* 256:13-16.
- Geppert M, Goda Y, Hammer RA, Li C, Rosahl TW, Stevens CF, Südhof TC (1994) Synaptotagmin I: a major Ca<sup>2+</sup> sensor for transmitter release at a central synapse. *Cell* 79:717-727.
- Ghorbel MT, Seugnet I, Hadj-Sahraoui N, Topilko P, Levi G, Demeneix B (1999) Thyroid hormone effects of Krox-24 transcription in the post-natal mouse brain are developmentally regulated but are not correlated with mitosis. *Oncogene* 18:917-924.
- Gould E, Butcher LL (1989) Developing cholinergic basal forebrain neurons are sensitive to thyroid hormone. *J Neurosci* 9:3347-3358.
- Hagen SG, Larson RL, Strait KA, Oppenheimer JH (1996) A Purkinje cell protein-2 intronic thyroid hormone response element binds developmentally regulated thyroid hormone receptor-nuclear protein complexes. *J Mol Neurosci* 7:245-255.
- Hetzel BS (1994) Iodine deficiency and fetal brain damage. *New Engl J Med* 331:1770-1771.
- Höög C, Schalling M, Grunder-Brundell E, Daneshmandi B (1991) Analysis of a male germ cell-specific transcript that encodes a putative zinc finger protein. *Mol Reprod Dev* 30:173-181.
- Hörlein AJ, Näär AM, Heinzel T, Torchia J, Gloss B, Kurokawa R, Ryan A, Kamei Y, Söderström M, Glass K, Rosenfeld MG (1995) Ligand-independent repression by the thyroid hormone receptor mediated by a nuclear receptor co-repressor. *Nature* 377:397-404.
- Huttenlocher, PR (1991) Dendritic and synaptic pathology in mental retardation. *Pediatr Neurol* 7:79-85.
- Ibarrola N, Rodríguez-Peña A (1997) Hypothyroidism coordinately and transiently affects myelin protein expression in most rat brain regions during postnatal development. *Brain Res* 752:285-293.
- Iglesias T, Caubín J, Stunnenberg HG, Zaballos A, Bernal J, Muñoz (1996) Thyroid hormone-dependent transcriptional repression of neural cell adhesion molecule during brain maturation. *EMBO J* 15:4307-4316.
- Iñiguez MA, Rodríguez-Peña A, Ibarrola N, Morreale de Escobar G, Bernal J (1992) Adult rat brain is sensitive to thyroid hormone. *J Clin Invest* 90:554-558.
- Iñiguez MG, Rodríguez-Peña A, Ibarrola N, Aguilera M, Muñoz A, Bernal J (1993) Thyroid hormone regulation of RC3, a brain-specific gene encoding a protein kinase-C substrate. *Endocrinology* 133:467-473.
- Jahner D, Hunter T (1991) The stimulation of quiescent rat fibroblasts by v-src and v-fos oncogenic protein-tyrosine kinases leads to induction of a subset of immediate early genes. *Oncogene* 6:1259-1268.
- Johe KK, Hazel TG, Muller T, Dugich-Djordjevic MM, McKay RD (1996) Single factors direct the differentiation of stem cells from the fetal and adult central nervous system. *Genes Dev* 10:3129-3140.
- Klein AH, Meltzer S, Kenny FM (1972) Improved prognosis in congenital hypothyroidism treated before age three months. *J Pediatr* 81: 912-920.
- Klein RZ, Mitchell ML, Foley TP Jr (1996) Hypothyroidism in infants and children. In: *The thyroid* (Braverman LE, Utiger RD, eds), pp. 984-999. New York: J.B. Lippincott.
- Knipper M, Gestwa L, Cate WJT, Lautermann J, Brugger H, Maier H, Zimmermann U, Rohbock K, Köpschall I, Wiechers B, Zenner H-P (1999) Distinct thyroid hormone-dependent expression of TrkB and p75NGFR in nonneuronal cells during the critical TH-dependent period of the cochlea. *J Neurobiol* 38:338-356.
- Koibuchi N, Fukuda H, Chin WW (1999) Promoter-specific regulation of the brain-derived neurotrophic factor gene by thyroid hormone in the developing rat cerebellum. *Endocrinology* 140:3955-3961.
- Koenig RJ (1998) Thyroid hormone receptor coactivators and corepressors. *Thyroid* 8:703-713.
- Krebs J, Means RL, Honegger P (1996) Induction of calmodulin kinase IV by thyroid hormone during the development of rat brain. *J Biol Chem* 271:11055-11058.
- Lau F, Nathans D (1985) Identification of a set of genes expressed during the G<sub>0</sub>/G<sub>1</sub> transition of cultured mouse cells. *EMBO J* 4:3145-3151.
- Lazar MA (1993) Thyroid hormone receptors: multiple forms, multiple possibilities. *Endocr Rev* 14:184-193.
- Légrand J (1979) Morphogenetic actions of thyroid hormones. *Trends Neurosci* 2:234-236.
- Leingartner A, Heisenberg CP, Kolbeck R, Thoenen H, Lindholm D (1994) Brain-derived neurotrophic factor increases neurotrophin-3 expression in cerebellar granule neurons. *J Biol Chem* 269:828-830.
- Lindholm D, Castrén E, Tsoulfas P, Kolbeck R, Berzaghi MP, Leingärtner A, Heisenberg CP, Tesarollo L, Parada LF, Thoenen H (1993) Neurotrophin-3 induced by triiodothyronine in cerebellar granule cells promotes Purkinje cell differentiation. *J Cell Biol* 122:443-450.
- Lyon MF, Searle AG (1989) Genetic variants and strains of the laboratory mouse, 2nd edn, pp. 311-312. Oxford: Oxford University Press.
- Martínez de Arrieta C, Morte B, Coloma A, Bernal J (1999) The human RC3 gene homolog, NRG1 contains a thyroid hormone-responsive element located in the first intron. *Endocrinology* 140:335-343.
- Mellström B, Naranjo JR, Santos A, Gonzalez AM, Bernal J (1991) Independent expression of the  $\alpha$  and  $\beta$  c-erbA genes in developing rat brain. *Mol Endocrinol* 5:1339-1350.
- Mellström B, Pipaón C, Naranjo J-R, Perez-Castillo A, Santos A (1994) Differential effect of thyroid hormone on NGFI-A gene expression in developing rat brain. *Endocrinology* 135:583-588.
- Morreale de Escobar G, Ruiz-Marcos A, Escobar del Rey F (1983) Thyroid hormone and the developing brain. In: *Congenital hypothyroidism* (Dussault JH, Walker P, eds), pp. 85-126. New York: Marcel Dekker.
- Muñoz A, Rodríguez-Peña A, Perez-Castillo A, Ferreiro B, Sutcliffe JG, Bernal J (1991) Effects of neonatal hypothyroidism on rat brain gene expression. *Mol Endocrinol* 5:273-280.
- Nicholson JL, Altman J (1972) The effects of early hypo- and hyperthyroidism on the development of the rat cerebellar cortex (I and II). *Brain Res* 44:13-36.
- Oh JD, Butcher LL, Woolf NJ (1991) Thyroid hormone modulates the development of cholinergic terminal fields in the rat forebrain: relation to nerve growth factor receptor. *Devl Brain Res* 59:133-142.
- Oppenheimer JH, Schwartz HL (1997) Molecular basis of thyroid hormone-dependent brain development. *Endocr Rev* 18:462-475.
- Pogacar S, Nora NF, Kemper TL (1973) Neuropathological findings in the Rubinstein-Taybi syndrome. *Roy Inst Med J* 56:114-121.
- Pombo PMG, Baretino D, Ibarrola N, Vega S, Rodríguez-Peña A (1999) Stimulation of the myelin basic protein gene expression by 9-cis-retinoic acid and thyroid hormone: activation in the context of its native promoter. *Mol Brain Res* 64:92-100.
- Rabie A, Légrand J (1973) Effects of thyroid hormone and undernourishment on the amount of synaptosomal fraction in the cerebellum of the young rat. *Brain Res* 61:267-278.
- Rakic P, Caviness VS Jr (1995) Cortical development: view from neurological mutants two decades later. *Neuron* 14:1101-1103.
- Rami A, Patel AJ, Rabie A (1986) Thyroid hormone and development of the rat hippocampus: morphological alterations in granule and pyramidal cells. *Neuroscience* 19:1217-1226.
- Rodríguez-Peña A, Ibarrola N, Iñiguez A, Muñoz A, Bernal J (1993) Neonatal hypothyroidism affects the timely expression of myelin-associated glycoprotein in the rat brain. *J Clin Invest* 91:812-818.
- Roskoden T, Heese K, Otten U, Schwegler H (1999) Modulation of mRNA expression of the neuropotrophins of the nerve-growth-factor family and their receptors in the septum and hippocampus of rats after transient postnatal thyroxine treatment. *Exp Brain Res* 127:307-313.
- Ruiz-Marcos A, Sanchez-Toscana F, Escobar del Rey F, Morreale de

- Escobar G (1979) Severe hypothyroidism and the maturation of the rat cerebral cortex. *Brain Res* 162:315-329.
- Schwartz HL (1983) Effect of thyroid hormone on growth and development. In: *Molecular basis of thyroid hormone action* (Oppenheimer, JH, Samuels, HH), pp. 413-444. New York: Academic Press.
- Schwartz HL, Oppenheimer JH (1978) Ontogenesis of 3,5,3'-triiodothyronine receptors in neonatal rat brain: dissociation between receptor concentration and stimulation of oxygen consumption by 3,5,3'-triiodothyronine. *Endocrinology* 103:943-948.
- Schwartz PM, Borghesani PR, Levy RL, Pomeroy SL, Segal RA (1997) Abnormal cerebellar development and foliation in BDNF<sup>-/-</sup> mice reveals a role for neurotrophins in CNS patterning. *Neuron* 19: 269-281.
- Strait KA, Zou L, Oppenheimer JH (1992)  $\beta$ 1 isoform-specific regulation of a triiodothyronine-induced gene during cerebellar development. *Mol Endocrinol* 6:1874-1880.
- Strait KA, Carlson DJ, Schwartz HL, Oppenheimer JH (1997) Transient stimulation of myelin basic protein gene expression in differentiating cultured oligodendrocytes: a model for 3,5,3'-triiodothyronine-induced brain development. *Endocrinology* 138:635-641.
- Südhof TC, Rizo J (1996) Synaptotagmins: C2-domain proteins that regulate membrane traffic. *Cell* 17:379-388.
- Thompson CC (1996) Thyroid hormone-responsive genes in developing cerebellum include a novel synaptotagmin and a *hairless* homolog. *J Neurosci* 16:7832-7840.
- Thompson CC, Bottcher MC (1997) The product of a thyroid hormone responsive gene interacts with thyroid hormone receptors. *Proc Natl Acad Sci USA* 94:8527-8532.
- Tomasiewicz H, Ono K, Yee D, Thompson C, Goridis C, Rutishauser U, Magnuson T (1993) Genetic deletion of a neural cell adhesion molecule variant (N-CAM-180) produces distinct defects in the central nervous system. *Neuron* 11:1163-1174.
- Tosic M, Torch S, Comte V, Dolivo M, Honegger P, Matthieu J (1992) Triiodothyronine has diverse and multiple stimulating effects on expression of the major myelin protein genes. *J Neurochem* 59: 1770-1777.
- Tsai M-J, O'Malley BW (1994) Molecular mechanisms of action of steroid/thyroid receptor superfamily members. *Annu Rev Biochem* 63:451-486.
- Wang Z, Brown DD (1991) A gene expression screen. *Proc Natl Acad Sci USA* 88:11505-11509.
- Xu L, Glass CK, Rosenfeld MG (1999) Coactivator and corepressor complexes in nuclear receptor function. *Curr Opin Gen Dev* 9: 140-147.
- Zou L, Hagen SG, Strait KA, Oppenheimer JH (1994) Identification of thyroid hormone response elements in rodent Pcp-2, a developmentally regulated gene of cerebellar Purkinje cells. *J Biol Chem* 269:13346-13352.
